# Supplementary material for: Radiomics-Based Machine Learning in Differentiation Between Primary Central Nervous System Lymphoma And Solitary Brain Metastasis
Source: Research Square preprint supplement (doi:10.21203/rs.3.rs-3549220/v1), 2023-11-07
Supplement: Supplementary file 1 [file 62dc42deecc4e480cddceb5c.docx]

Table S1 Radiomics Screening Features

| No. | Feature |
| --- | --- |
| 1 | original_shape_Sphericity |
| 2 | log_sigma_2_0_mm_3D_firstorder_Skewness |
| 3 | log_sigma_3_0_mm_3D_glcm_InverseVariance |
| 4 | log_sigma_4_0_mm_3D_glszm_SizeZoneNonUniformityNormalized |
| 5 | log_sigma_5_0_mm_3D_firstorder_Kurtosis |
| 6 | log_sigma_5_0_mm_3D_glszm_GrayLevelVariance |
| 7 | log_sigma_5_0_mm_3D_gldm_DependenceVariance |
| 8 | wavelet_LLH_glcm_Correlation |
| 9 | wavelet_LHL_glszm_SmallAreaEmphasis |
| 10 | wavelet_LHH_firstorder_Skewness |
| 11 | wavelet_LHH_glrlm_LongRunLowGrayLevelEmphasis |
| 12 | wavelet_HLL_glcm_MaximumProbability |
| 13 | wavelet_HHL_firstorder_Mean |
| 14 | wavelet_HHL_firstorder_Skewness |
| 15 | wavelet_HHL_glrlm_RunLengthNonUniformityNormalized |
| 16 | wavelet_HHL_glszm_GrayLevelVariance |
| 17 | wavelet_HHL_gldm_GrayLevelVariance |
| 18 | wavelet_HHH_firstorder_Skewness |
| 19 | square_gldm_LargeDependenceHighGrayLevelEmphasis |
| 20 | logarithm_firstorder_10Percentile |
| 21 | logarithm_firstorder_Minimum |
| 22 | exponential_glszm_SmallAreaEmphasis |
| 23 | exponential_ngtdm_Busyness |
